# Supplementary material for: The intramolecular Diels–Alder reaction of tryptamine-derived Zincke aldehydes is a stepwise process
Source: Royal Society of Chemistry journal article supplement (doi:10.1039/c2sc01072k), 2012-01-01
Supplement: c2sc01072k.pdf [file c2sc01072k.pdf]

## Supporting Information

for

### The Intramolecular Diels–Alder Reaction of Tryptamine-Derived Zincke Aldehydes is a Stepwise Process

Hung V. Pham, David B. C. Martin, Christopher D. Vanderwal,\* and K. N. Houk\*

Department of Chemistry and Biochemistry, University of California, Los Angeles, CA  
90095-1569, and Department of Chemistry, University of California, Irvine, CA 92697-  
2025

#### Contents

|                                                                               | Page |
|-------------------------------------------------------------------------------|------|
| Complete Citation for Gaussian 09                                             | S2   |
| List of Different Bases Surveyed for the Anionic Cycloaddition                | S3   |
| Reaction Coordinate Diagram for the Li <sup>+</sup> Counterion                | S4   |
| B3LYP/6-31G(d) Gas-Phase Geometries and M06-2X/6-311+G(d,p)<br>Total Energies | S5   |

*For experimental procedures corresponding to the computational experiments  
described herein, please see reference 7 from the text of the main paper.*

### **Complete Citation for Gaussian 09**

All calculations were conducted using the Gaussian 09 package. The complete citation is as follows:

Gaussian 09, Revision A.02, Frisch, M. J., Trucks, G. W., Schlegel, H. B., Scuseria, G. E., Robb, M. A., Cheeseman, J. R., Scalmani, G., Barone, V., Mennucci, B., Petersson, G. A., Nakatsuji, H., Caricato, M., Li, X., Hratchian, H. P., Izmaylov, A. F., Bloino, J., Zheng, G., Sonnenberg, J. L., Hada, M., Ehara, M., Toyota, K., Fukuda, R., Hasegawa, J., Ishida, M., Nakajima, T., Honda, Y., Kitao, O., Nakai, H., Vreven, T., Montgomery, Jr., J. A., Peralta, J. E., Ogliaro, F., Bearpark, M., Heyd, J. J., Brothers, E., Kudin, K. N., Staroverov, V. N., Kobayashi, R., Normand, J., Raghavachari, K., Rendell, A., Burant, J. C., Iyengar, S. S., Tomasi, J., Cossi, M., Rega, Millam, N. J., Klene, M. Knox, J. E., Cross, J. B., Bakken, V., Adamo, C., Jaramillo, J., Gomperts, R. E. Stratmann, O. Yazyev, A. J. Austin, R. Cammi, C. Pomelli, J. W. Ochterski, R. Martin, R. L., Morokuma, K., Zakrzewski, V. G., Voth, G. A., Salvador, P., Dannenberg, J. J., Dapprich, S., Daniels, A. D., Farkas, O., Foresman, J. B., Ortiz, J. V., Cioslowski, J., and Fox, D. J., Gaussian, Inc., Wallingford CT, 2009.

### List of Different Bases Surveyed for the Anionic Cycloaddition

|                                                                                                                                                                           |                                   |
|---------------------------------------------------------------------------------------------------------------------------------------------------------------------------|-----------------------------------|
| KOt-Bu*, THF, 80 °C, sealed tube                                                                                                                                          | optimum conditions                |
| KOt-Bu, THF, 50 °C,                                                                                                                                                       | partial conversion to product     |
| KOt-Bu, 18-c-6, THF, up to 50 °C                                                                                                                                          | no reaction                       |
| KOt-Bu, DMSO, THF, up to 50 °C                                                                                                                                            | no reaction                       |
| KOt-Bu, PhH, up to 60 °C                                                                                                                                                  | no reaction                       |
| KH, THF, up to 50 °C                                                                                                                                                      | minimal conversion to product     |
| KH, 18-c-6, THF, up to 50 °C                                                                                                                                              | trace conversion to product       |
| KHMDS, THF, up to 60 °C                                                                                                                                                   | minimal conversion to product     |
| NaOt-Bu, THF, up to 50 °C,                                                                                                                                                | no reaction                       |
| NaH, THF, up to 50 °C                                                                                                                                                     | no reaction                       |
| NaHMDS, THF, up to 50 °C                                                                                                                                                  | no reaction                       |
| MeLi, THF, up to 50 °C                                                                                                                                                    | partial decomposition, no product |
| LiOt-Bu, THF, 80 °C, sealed tube                                                                                                                                          | no reaction                       |
| EtMgBr, THF, up to 80 °C (microwave)                                                                                                                                      | no reaction                       |
| K <sub>2</sub> CO <sub>3</sub> , Cs <sub>2</sub> CO <sub>3</sub> , K <sub>3</sub> PO <sub>4</sub> , CaH <sub>2</sub> , or Na <sub>2</sub> CO <sub>3</sub> ,<br>THF, 65 °C | no reaction                       |
| K <sub>2</sub> CO <sub>3</sub> , DMF, up to 80 °C                                                                                                                         | no reaction                       |
| DBU, THF, 65 °C                                                                                                                                                           | no reaction                       |
| P <sub>2</sub> Et and P <sub>4</sub> <i>t</i> -Bu phosphazene bases,<br>THF or MeCN, 60 °C                                                                                | no reaction                       |

\*in all cases for KOt-Bu, a commercially available 1 M solution in THF (Sigma–Aldrich) was used. Solid base did not dissolve readily in THF and led to poor results.

### Reaction Coordinate Diagram for the IMDA Reaction with Li<sup>+</sup> counterion

In addition to using a potassium cation as a counterion, Li<sup>+</sup> was also studied computationally to determine why lithiated bases did not effect the IMDA reaction. The reaction coordinate diagram for Li<sup>+</sup> is shown below. M06-2X/6-311+G\*\* single point calculations were conducted on B3LYP/6-31G\* optimized geometries. Solvent-corrected energies using CPCM for THF are shown in parentheses. The reaction profile is similar to that for the potassiated starting material, and product **8L** is 2.6 kcal/mol lower in energy than the starting material **5L**. These results suggest that the reaction is both kinetically and thermodynamically feasible, although laboratory experiments of this type have never succeeded.

QuickTime™ and a  
decompressor  
are needed to see this picture.

**B3LYP/6-31G(d) Gas-Phase Geometries and M06-2x/6-311+G(d,p) Total Energies**  
**(Hartrees)**

5

|   |           |           |           |
|---|-----------|-----------|-----------|
| C | -5.295924 | 1.190226  | 0.193969  |
| C | -4.420894 | 0.124812  | -0.082631 |
| C | -3.003278 | 0.383100  | -0.233574 |
| C | -2.517202 | 1.699067  | -0.104012 |
| C | -3.406399 | 2.734825  | 0.170581  |
| C | -4.788790 | 2.480709  | 0.320656  |
| C | -2.429148 | -0.894171 | -0.510422 |
| C | -3.522768 | -1.778683 | -0.493498 |
| N | -4.721453 | -1.203287 | -0.246222 |
| C | -0.984689 | -1.234512 | -0.689868 |
| C | -0.222513 | -1.206469 | 0.656540  |
| N | 1.213036  | -1.527537 | 0.562522  |
| C | 2.135675  | -0.554111 | 0.435792  |
| C | 3.473975  | -0.697048 | 0.143238  |
| C | 4.347982  | 0.421894  | 0.099916  |
| C | 5.691267  | 0.410424  | -0.161268 |
| C | 1.587359  | -2.911503 | 0.327051  |
| C | 6.464883  | 1.627921  | -0.172712 |
| O | 7.671078  | 1.720717  | -0.389369 |
| H | -6.361277 | 0.992148  | 0.305612  |
| H | -1.453912 | 1.916886  | -0.224889 |
| H | -3.034561 | 3.754314  | 0.270028  |
| H | -5.463460 | 3.308924  | 0.535953  |
| H | -3.461799 | -2.854669 | -0.671140 |
| H | -0.881841 | -2.236808 | -1.132718 |
| H | -0.469953 | -0.538674 | -1.373602 |
| H | -0.314149 | -0.212372 | 1.104087  |
| H | -0.685172 | -1.917036 | 1.350201  |
| H | 1.743565  | 0.446808  | 0.608698  |
| H | 3.890194  | -1.680176 | -0.059812 |
| H | 3.893723  | 1.396945  | 0.298109  |
| H | 0.741146  | -3.555158 | 0.575305  |
| H | 1.867225  | -3.090051 | -0.720884 |
| H | 2.439108  | -3.187937 | 0.960803  |
| H | 5.865406  | 2.547566  | 0.042642  |
| H | 6.218820  | -0.519574 | -0.366088 |

G(B3LYP/6-31G(d)) = -804.426331

G(M06-2X/6-311+G(d,p)) = -804.3061272

G(M06-2X/6-311+G(d,p),CPCM/THF) = -804.3786408

0 imaginary frequencies

---

## TS\_5-6

|   |           |           |           |
|---|-----------|-----------|-----------|
| C | -2.072791 | -2.819648 | -0.062883 |
| C | -1.294358 | -1.791360 | 0.472654  |
| C | -1.642993 | -0.420088 | 0.282811  |
| C | -2.815444 | -0.111866 | -0.418579 |
| C | -3.601598 | -1.145445 | -0.937858 |
| C | -3.229799 | -2.488713 | -0.770398 |
| C | -0.584431 | 0.358726  | 0.950447  |
| C | 0.226154  | -0.705829 | 1.539946  |
| N | -0.140245 | -1.933641 | 1.247385  |
| C | -0.883694 | 1.656602  | 1.678805  |
| C | -1.162616 | 2.737769  | 0.620944  |
| N | -0.264964 | 2.499824  | -0.510689 |
| C | 0.588370  | 1.342588  | -0.347437 |
| C | 1.893329  | 1.631296  | 0.164358  |
| C | 3.011134  | 0.798524  | 0.104505  |
| C | 3.154700  | -0.500441 | -0.376350 |
| C | 4.441657  | -1.116354 | -0.414633 |
| O | 4.740447  | -2.239531 | -0.842389 |
| C | -0.857961 | 2.662976  | -1.823675 |
| H | -1.774664 | -3.854291 | 0.088042  |
| H | -3.132910 | 0.917702  | -0.563150 |
| H | -4.513261 | -0.902936 | -1.481102 |
| H | -3.851941 | -3.276457 | -1.191290 |
| H | 1.126332  | -0.522572 | 2.121257  |
| H | -1.733083 | 1.574022  | 2.370812  |
| H | -0.003168 | 1.934422  | 2.270981  |
| H | -2.213403 | 2.675361  | 0.293805  |
| H | -1.028399 | 3.748870  | 1.039019  |
| H | 0.540263  | 0.631975  | -1.175893 |
| H | 2.007314  | 2.605619  | 0.634880  |
| H | 3.936542  | 1.247467  | 0.481231  |
| H | 2.304488  | -1.077448 | -0.731781 |
| H | 5.254511  | -0.460078 | 0.003025  |
| H | -1.328237 | 3.652946  | -1.891855 |
| H | -0.073564 | 2.621159  | -2.587280 |
| H | -1.621881 | 1.904790  | -2.074413 |

G(B3LYP/6-31G(d)) = -804.374724

G(M06-2X/6-311+G(d,p)) = -804.2606726

G(M06-2X/6-311+G(d,p),CPCM/THF) = -804.3304289

1 imaginary frequency

---

## 6

|   |           |           |           |
|---|-----------|-----------|-----------|
| C | -3.413651 | -1.586010 | 0.758549  |
| C | -2.576227 | -0.476128 | 0.708639  |
| C | -1.679689 | -0.278056 | -0.358845 |

|   |           |           |           |
|---|-----------|-----------|-----------|
| C | -1.608392 | -1.203338 | -1.390311 |
| C | -2.447399 | -2.326718 | -1.347678 |
| C | -3.339604 | -2.513853 | -0.287043 |
| C | -0.947028 | 1.009910  | -0.089233 |
| C | -1.602871 | 1.387116  | 1.221604  |
| N | -2.504945 | 0.576571  | 1.663954  |
| C | 0.626033  | 0.917703  | 0.038919  |
| C | 1.174163  | 0.186598  | 1.207539  |
| C | 2.198626  | -0.733020 | 1.141074  |
| C | 2.980799  | -1.204197 | 0.064135  |
| N | 0.946713  | 2.378350  | -0.025839 |
| C | 0.223868  | 2.889878  | -1.178846 |
| C | -1.126005 | 2.130990  | -1.163794 |
| C | 3.977153  | -2.187339 | 0.250881  |
| O | 4.742409  | -2.696912 | -0.593246 |
| C | 2.364032  | 2.679414  | -0.041670 |
| H | -4.096835 | -1.720682 | 1.592686  |
| H | -0.906512 | -1.075638 | -2.211177 |
| H | -2.395991 | -3.065044 | -2.144323 |
| H | -3.978661 | -3.394055 | -0.271702 |
| H | 0.726874  | 0.402971  | 2.176288  |
| H | 2.460590  | -1.190784 | 2.102264  |
| H | 2.844535  | -0.819079 | -0.946187 |
| H | -1.330851 | 2.287565  | 1.768147  |
| H | 0.981264  | 0.427549  | -0.889447 |
| H | 0.759911  | 2.679570  | -2.128628 |
| H | 0.103529  | 3.980522  | -1.116130 |
| H | -1.334867 | 1.680857  | -2.139172 |
| H | -1.971423 | 2.785574  | -0.924992 |
| H | 4.060185  | -2.524730 | 1.324150  |
| H | 2.516805  | 3.763480  | 0.053437  |
| H | 2.839691  | 2.171761  | 0.801219  |
| H | 2.867258  | 2.343303  | -0.970784 |

G(B3LYP/6-31G(d)) = -804.389652

G(M06-2X/6-311+G(d,p)) = -804.2837544

G(M06-2X/6-311+G(d,p),CPCM/THF) = -804.3583501

0 imaginary frequencies

---

### TS\_6-7

|   |           |           |           |
|---|-----------|-----------|-----------|
| C | 3.396725  | -1.261549 | -0.057874 |
| C | 2.044759  | -0.976923 | -0.321638 |
| C | 1.582399  | 0.361625  | -0.198802 |
| C | 2.437190  | 1.383886  | 0.172465  |
| C | 3.792437  | 1.096580  | 0.429799  |
| C | 4.252065  | -0.219517 | 0.313363  |
| C | 0.100569  | 0.344689  | -0.515760 |
| C | -0.079886 | -1.173567 | -0.810301 |

|   |           |           |           |
|---|-----------|-----------|-----------|
| N | 1.077982  | -1.853476 | -0.764030 |
| C | -0.748892 | 0.998611  | 0.644486  |
| C | -0.951629 | 0.167231  | 1.878280  |
| C | -1.152531 | -1.168883 | 1.869204  |
| C | -1.463344 | -1.932004 | 0.674258  |
| N | -1.953882 | 1.482628  | -0.058578 |
| C | -1.436054 | 2.150093  | -1.242791 |
| C | -0.340718 | 1.198393  | -1.759108 |
| C | -2.706944 | -1.717430 | -0.021192 |
| O | -3.140962 | -2.411975 | -0.952502 |
| C | -2.820076 | 2.309837  | 0.750593  |
| H | 3.758989  | -2.282672 | -0.150048 |
| H | 2.074926  | 2.408205  | 0.265023  |
| H | 4.475255  | 1.894139  | 0.715211  |
| H | 5.300329  | -0.438623 | 0.516265  |
| H | -0.745155 | 0.664876  | 2.825415  |
| H | -1.034964 | -1.704147 | 2.818378  |
| H | -1.102835 | -2.958716 | 0.628602  |
| H | -0.817427 | -1.482300 | -1.548821 |
| H | -0.168970 | 1.892588  | 0.965347  |
| H | -0.995316 | 3.139798  | -0.988662 |
| H | -2.237913 | 2.327529  | -1.971292 |
| H | 0.504408  | 1.745987  | -2.187037 |
| H | -0.740975 | 0.545168  | -2.540386 |
| H | -3.267352 | -0.810855 | 0.296140  |
| H | -3.699635 | 2.610370  | 0.167130  |
| H | -3.158858 | 1.738758  | 1.620913  |
| H | -2.321923 | 3.235202  | 1.116190  |

G(B3LYP/6-31G(d)) = -804.361063

G(M06-2X/6-311+G(d,p)) = -804.2553887

G(M06-2X/6-311+G(d,p),CPCM/THF) = -804.3259343

1 imaginary frequency

---

## 7

|   |           |           |           |
|---|-----------|-----------|-----------|
| C | -2.459359 | -2.365388 | 0.154440  |
| C | -1.290534 | -1.583491 | 0.396510  |
| C | -1.306726 | -0.220478 | -0.076836 |
| C | -2.382452 | 0.301274  | -0.772400 |
| C | -3.515788 | -0.497719 | -1.027630 |
| C | -3.531293 | -1.815622 | -0.543131 |
| H | -2.489093 | -3.395545 | 0.504599  |
| H | -2.363019 | 1.332553  | -1.129949 |
| H | -4.361871 | -0.097893 | -1.582314 |
| H | -4.409459 | -2.436736 | -0.729562 |
| C | -0.035781 | 0.420253  | 0.458388  |
| C | 0.776600  | -0.878786 | 0.802026  |
| N | -0.160311 | -1.966022 | 1.009586  |



|   |           |           |           |
|---|-----------|-----------|-----------|
| C | 0.649131  | 1.474976  | -0.482911 |
| C | 2.102914  | 1.191038  | -0.777019 |
| H | 2.730856  | 2.052767  | -1.006402 |
| C | 2.613034  | -0.043420 | -0.770162 |
| H | 3.666687  | -0.224652 | -0.974802 |
| C | 1.758530  | -1.218843 | -0.403781 |
| H | 1.066732  | -1.480251 | -1.223065 |
| H | 1.415517  | -0.702409 | 1.680440  |
| H | 0.090784  | 1.488103  | -1.437691 |
| N | 0.504607  | 2.793149  | 0.191132  |
| C | -0.556659 | 2.666573  | 1.188486  |
| H | -1.567773 | 2.749643  | 0.742798  |
| H | -0.463556 | 3.458798  | 1.945579  |
| C | -0.334759 | 1.262609  | 1.736476  |
| H | -1.189793 | 0.868381  | 2.291452  |
| H | 0.543070  | 1.265715  | 2.396519  |
| C | 2.533981  | -2.466315 | -0.090327 |
| H | 1.898461  | -3.286443 | 0.298169  |
| O | 3.741606  | -2.606928 | -0.221579 |
| C | 0.341235  | 3.908155  | -0.713940 |
| H | 0.305762  | 4.847909  | -0.146870 |
| H | 1.193733  | 3.967803  | -1.401756 |
| H | -0.582412 | 3.848901  | -1.328688 |

G(B3LYP/6-31G(d)) = -804.379609

G(M06-2X/6-311+G(d,p)) = -804.282635

G(M06-2X/6-311+G(d,p),CPCM/THF) = -804.3503325

0 imaginary frequencies

---

## 8

|   |           |           |           |
|---|-----------|-----------|-----------|
| C | -2.567514 | -2.298229 | -0.568628 |
| C | -1.403322 | -1.626173 | -0.181522 |
| C | -1.470922 | -0.306512 | 0.315463  |
| C | -2.698950 | 0.328867  | 0.442351  |
| C | -3.873643 | -0.347845 | 0.074237  |
| C | -3.798837 | -1.644592 | -0.439075 |
| C | -0.056773 | 0.230776  | 0.477987  |
| C | 0.776808  | -1.091500 | 0.514507  |
| N | -0.095685 | -2.114804 | -0.170114 |
| C | 0.247173  | 1.201937  | -0.722556 |
| C | 1.686019  | 1.154744  | -1.163632 |
| C | 2.513771  | 0.127481  | -0.828989 |
| C | 2.173821  | -0.988796 | -0.008472 |
| N | -0.220464 | 2.497403  | -0.145810 |
| C | 0.347147  | 2.563495  | 1.196801  |
| C | 0.202806  | 1.122585  | 1.726009  |
| C | 3.146576  | -1.941688 | 0.374709  |
| O | 4.345211  | -2.019087 | 0.026933  |

|   |           |           |           |
|---|-----------|-----------|-----------|
| C | 0.009461  | 3.675724  | -0.951860 |
| H | -2.513730 | -3.315591 | -0.950015 |
| H | -2.739690 | 1.359242  | 0.786161  |
| H | -4.839191 | 0.143200  | 0.176023  |
| H | -4.710437 | -2.163088 | -0.732375 |
| H | 2.038300  | 1.947156  | -1.822541 |
| H | 3.543804  | 0.132500  | -1.187518 |
| H | 0.791121  | -1.418778 | 1.568000  |
| H | -0.434683 | 0.983275  | -1.561482 |
| H | -0.197327 | 3.305160  | 1.799387  |
| H | 1.411811  | 2.863205  | 1.184605  |
| H | -0.620556 | 1.033600  | 2.443690  |
| H | 1.120093  | 0.799953  | 2.229614  |
| H | 2.746194  | -2.717113 | 1.086142  |
| H | 1.078779  | 3.931551  | -1.083488 |
| H | -0.429586 | 3.534347  | -1.947568 |
| H | -0.483774 | 4.541367  | -0.487055 |
| H | 0.288504  | -2.447133 | -1.049553 |

G(B3LYP/6-31G(d)) = -804.399206

G(M06-2X/6-311+G(d,p)) = -804.3024628

G(M06-2X/6-311+G(d,p),CPCM/THF) = -804.3725469

0 imaginary frequencies

---

## 5K

|   |           |           |           |
|---|-----------|-----------|-----------|
| C | -1.079438 | 2.634625  | -0.487553 |
| C | -0.349984 | 1.854206  | 0.432663  |
| C | 1.028252  | 1.526050  | 0.164064  |
| C | 1.624262  | 1.972892  | -1.029723 |
| C | 0.877749  | 2.718770  | -1.936041 |
| C | -0.466967 | 3.051268  | -1.666310 |
| C | 1.463853  | 0.771322  | 1.297948  |
| C | 0.341347  | 0.698753  | 2.127930  |
| N | -0.766614 | 1.327905  | 1.634603  |
| C | 1.634166  | -1.936148 | -0.805920 |
| C | 0.450792  | -2.138684 | -0.128592 |
| C | -0.766320 | -2.320338 | -0.809615 |
| C | -2.003453 | -2.273007 | -0.199205 |
| N | 2.824803  | -1.588238 | -0.289737 |
| C | 3.017024  | -1.302163 | 1.137368  |
| C | 2.825144  | 0.185515  | 1.537792  |
| C | -3.224307 | -2.129934 | -0.924196 |
| O | -4.285165 | -1.695438 | -0.436422 |
| C | 3.964245  | -1.326843 | -1.158922 |
| H | -2.090107 | 2.978882  | -0.251224 |
| H | 2.670027  | 1.753156  | -1.245528 |
| H | 1.338762  | 3.068859  | -2.856908 |
| H | -1.020468 | 3.662460  | -2.375641 |

|   |           |           |           |
|---|-----------|-----------|-----------|
| H | 0.402049  | -1.962559 | 0.939391  |
| H | -0.737147 | -2.410765 | -1.898130 |
| H | -2.051285 | -2.178244 | 0.886566  |
| H | 0.292477  | 0.207633  | 3.098718  |
| H | 1.636392  | -2.054117 | -1.888022 |
| H | 4.036364  | -1.622833 | 1.389180  |
| H | 2.334119  | -1.936348 | 1.707483  |
| H | 3.591018  | 0.783267  | 1.023871  |
| H | 3.083665  | 0.232427  | 2.605922  |
| H | -3.183281 | -2.372591 | -2.007721 |
| H | 4.819512  | -1.946293 | -0.861965 |
| H | 3.704299  | -1.559192 | -2.193674 |
| H | 4.263481  | -0.273573 | -1.106438 |
| K | -3.117582 | 0.478840  | 0.726385  |

G(B3LYP/6-31G(d)) = -1404.335443

G(M06-2X/6-311+G(d,p)) = -1404.231432

G(M06-2X/6-311+G(d,p),CPCM/THF) = -1404.262572

0 imaginary frequencies

---

## TS\_5-6K

|   |           |           |           |
|---|-----------|-----------|-----------|
| C | 0.791912  | 3.157542  | -0.168409 |
| C | 0.592108  | 1.880345  | 0.359789  |
| C | 1.605880  | 0.885084  | 0.302450  |
| C | 2.851860  | 1.215716  | -0.241535 |
| C | 3.055473  | 2.497791  | -0.757271 |
| C | 2.031685  | 3.457402  | -0.733259 |
| C | 1.034469  | -0.322516 | 0.926911  |
| C | -0.254595 | 0.166150  | 1.382138  |
| N | -0.549440 | 1.404219  | 1.023477  |
| C | 0.610151  | -1.757832 | -0.430405 |
| C | -0.413987 | -2.645196 | 0.081945  |
| C | -1.769697 | -2.434845 | -0.027255 |
| C | -2.439581 | -1.314338 | -0.567400 |
| N | 1.917173  | -2.292883 | -0.519853 |
| C | 2.664362  | -2.209889 | 0.739383  |
| C | 1.872523  | -1.308464 | 1.721287  |
| C | -3.837002 | -1.173937 | -0.541282 |
| O | -4.495390 | -0.149377 | -0.885336 |
| C | 2.660766  | -2.020593 | -1.742531 |
| H | 0.008630  | 3.910827  | -0.106181 |
| H | 3.666774  | 0.497160  | -0.257908 |
| H | 4.023399  | 2.757959  | -1.177777 |
| H | 2.214153  | 4.448446  | -1.140579 |
| H | -0.061267 | -3.552567 | 0.564525  |
| H | -2.414951 | -3.220960 | 0.371517  |
| H | -1.855584 | -0.516743 | -1.027567 |
| H | -0.977874 | -0.447618 | 1.910568  |

|   |           |           |           |
|---|-----------|-----------|-----------|
| H | 0.327373  | -1.152335 | -1.293276 |
| H | 3.655794  | -1.784119 | 0.533846  |
| H | 2.834272  | -3.201463 | 1.181657  |
| H | 2.561360  | -0.804053 | 2.409615  |
| H | 1.201676  | -1.924776 | 2.329432  |
| H | -4.397989 | -2.045629 | -0.139533 |
| H | 3.566871  | -2.635529 | -1.753206 |
| H | 2.057989  | -2.314946 | -2.607063 |
| H | 2.953328  | -0.966664 | -1.865258 |
| K | -3.121733 | 1.680745  | 0.199851  |

G(B3LYP/6-31G(d)) = -1404.298962

G(M06-2X/6-311+G(d,p)) = -1404.199414

G(M06-2X/6-311+G(d,p),CPCM/THF) = -1404.226853

1 imaginary frequency

---

## 6K

|   |           |           |           |
|---|-----------|-----------|-----------|
| C | -1.215493 | 2.897573  | 0.159008  |
| C | -0.496589 | 1.787991  | 0.594763  |
| C | 0.701249  | 1.382482  | -0.024962 |
| C | 1.178242  | 2.091989  | -1.121118 |
| C | 0.455142  | 3.205021  | -1.577216 |
| C | -0.723445 | 3.607753  | -0.943961 |
| C | 1.210030  | 0.174280  | 0.736363  |
| C | 0.071080  | 0.012362  | 1.713756  |
| N | -0.859399 | 0.910980  | 1.658504  |
| C | 1.556310  | -1.109120 | -0.165064 |
| C | 0.930727  | -2.421038 | 0.229675  |
| C | -0.353812 | -2.783147 | -0.021397 |
| C | -1.394239 | -2.011821 | -0.635161 |
| N | 3.030949  | -1.215081 | -0.085016 |
| C | 3.595803  | 0.020630  | 0.421884  |
| C | 2.565700  | 0.451732  | 1.462296  |
| C | -2.710296 | -2.465858 | -0.744306 |
| O | -3.723683 | -1.792666 | -1.122930 |
| C | 3.655245  | -1.750086 | -1.278021 |
| H | -2.114611 | 3.221111  | 0.680293  |
| H | 2.088897  | 1.794197  | -1.632373 |
| H | 0.819483  | 3.762073  | -2.435836 |
| H | -1.260837 | 4.479211  | -1.307502 |
| H | 1.595413  | -3.101240 | 0.755696  |
| H | -0.657180 | -3.775263 | 0.323079  |
| H | 0.027701  | -0.801369 | 2.431899  |
| H | 1.240576  | -0.839611 | -1.188837 |
| H | 3.719889  | 0.805278  | -0.352892 |
| H | 4.586765  | -0.157646 | 0.858898  |
| H | 2.661149  | 1.493802  | 1.779192  |
| H | 2.647761  | -0.193913 | 2.343306  |

|   |           |           |           |
|---|-----------|-----------|-----------|
| H | -2.879951 | -3.513910 | -0.409125 |
| H | 4.717953  | -1.941030 | -1.088302 |
| H | 3.179241  | -2.699548 | -1.541486 |
| H | 3.579925  | -1.073207 | -2.153366 |
| K | -3.282467 | 0.079152  | 0.480703  |
| H | -1.150598 | -1.037266 | -1.066210 |

G(B3LYP/6-31G(d)) = -1404.298962

G(M06-2X/6-311+G(d,p)) = -1404.199414

G(M06-2X/6-311+G(d,p),CPCM/THF) = -1404.226853

0 imaginary frequencies

---

### TS\_6-7K

|   |           |           |           |
|---|-----------|-----------|-----------|
| C | -3.372525 | -0.312345 | -0.012555 |
| C | -1.992784 | -0.222620 | -0.231778 |
| C | -1.174589 | -1.364535 | -0.042232 |
| C | -1.718682 | -2.571514 | 0.365939  |
| C | -3.101700 | -2.656559 | 0.596963  |
| C | -3.912343 | -1.534697 | 0.401769  |
| C | 0.229453  | -0.967213 | -0.434840 |
| C | 0.041114  | 0.555855  | -0.528618 |
| N | -1.269234 | 0.891334  | -0.655513 |
| C | 1.435458  | -1.470312 | 0.397972  |
| C | 1.550046  | -0.964057 | 1.808222  |
| C | 1.168423  | 0.253437  | 2.211621  |
| C | 0.694772  | 1.333877  | 1.320812  |
| N | 2.561232  | -1.111424 | -0.484631 |
| C | 2.183829  | -1.591719 | -1.818020 |
| C | 0.639740  | -1.497504 | -1.854640 |
| C | 1.610536  | 2.290736  | 0.793031  |
| O | 1.290493  | 3.400964  | 0.294489  |
| C | 3.865361  | -1.569431 | -0.047094 |
| H | -4.011527 | 0.555368  | -0.164243 |
| H | -1.089287 | -3.448276 | 0.508699  |
| H | -3.540676 | -3.595284 | 0.923745  |
| H | -4.983062 | -1.610992 | 0.578590  |
| H | 1.893511  | -1.681400 | 2.551850  |
| H | 1.180831  | 0.462984  | 3.285228  |
| H | -0.260443 | 1.766435  | 1.630910  |
| H | 0.759637  | 1.108015  | -1.130134 |
| H | 1.343931  | -2.576883 | 0.460590  |
| H | 2.500467  | -2.640699 | -1.974951 |
| H | 2.677805  | -0.986927 | -2.588641 |
| H | 0.195459  | -2.485283 | -2.008912 |
| H | 0.264379  | -0.846300 | -2.649334 |
| H | 2.666786  | 1.966895  | 0.727128  |
| H | 4.630507  | -1.221681 | -0.750717 |
| H | 4.093583  | -1.151317 | 0.938030  |

|   |           |           |           |
|---|-----------|-----------|-----------|
| H | 3.939348  | -2.674573 | 0.015322  |
| K | -1.079255 | 3.532865  | -0.646704 |

G(B3LYP/6-31G(d)) = -1404.28135

G(M06-2X/6-311+G(d,p)) = -1404.189495

G(M06-2X/6-311+G(d,p),CPCM/THF) = -1404.21813

1 imaginary frequency

---

## 7K

|   |           |           |           |
|---|-----------|-----------|-----------|
| C | -1.850917 | 2.333704  | 0.244893  |
| C | -1.037842 | 1.182545  | 0.428393  |
| C | 0.298315  | 1.221133  | -0.086572 |
| C | 0.758549  | 2.295973  | -0.822379 |
| C | -0.081654 | 3.405845  | -1.052339 |
| C | -1.359522 | 3.418876  | -0.493214 |
| C | 0.987461  | -0.022995 | 0.446294  |
| C | -0.271142 | -0.890353 | 0.800714  |
| N | -1.376561 | 0.012414  | 1.028505  |
| C | 2.079542  | -0.648413 | -0.487718 |
| C | 1.888628  | -2.123130 | -0.731793 |
| C | 0.687467  | -2.704348 | -0.722984 |
| C | -0.558272 | -1.906618 | -0.438126 |
| N | 3.381339  | -0.403416 | 0.173582  |
| C | 3.190935  | 0.637343  | 1.181617  |
| C | 1.806329  | 0.318327  | 1.730136  |
| C | -1.719647 | -2.771402 | -0.112974 |
| O | -2.898971 | -2.488875 | -0.314824 |
| C | 4.484059  | -0.171675 | -0.736756 |
| H | -2.811189 | 2.425234  | 0.758876  |
| H | 1.772577  | 2.302059  | -1.219318 |
| H | 0.276311  | 4.252707  | -1.630389 |
| H | -1.992162 | 4.295330  | -0.624934 |
| H | 2.786610  | -2.708295 | -0.921144 |
| H | 0.595910  | -3.775919 | -0.897362 |
| H | -0.825592 | -1.248986 | -1.277711 |
| H | -0.067580 | -1.529175 | 1.667820  |
| H | 2.042714  | -0.123055 | -1.460280 |
| H | 3.211739  | 1.657114  | 0.750405  |
| H | 3.983157  | 0.583632  | 1.939168  |
| H | 1.358173  | 1.137618  | 2.297546  |
| H | 1.866152  | -0.566002 | 2.376482  |
| H | -1.478523 | -3.731614 | 0.391246  |
| H | 5.415846  | -0.067643 | -0.168956 |
| H | 4.603000  | -1.023936 | -1.415905 |
| H | 4.358254  | 0.739786  | -1.356387 |
| K | -3.776359 | -0.074721 | 0.000615  |

G(B3LYP/6-31G(d)) = -1404.296142

G(M06-2X/6-311+G(d,p)) = -1404.211389  
G(M06-2X/6-311+G(d,p),CPCM/THF) = -1404.240008

0 imaginary frequencies

---

## 8K

|   |           |           |           |
|---|-----------|-----------|-----------|
| C | -0.767657 | 3.028125  | -0.795816 |
| C | -0.493680 | 1.707203  | -0.451282 |
| C | 0.694989  | 1.352159  | 0.201684  |
| C | 1.630561  | 2.334338  | 0.514059  |
| C | 1.363465  | 3.667729  | 0.176905  |
| C | 0.177917  | 4.010661  | -0.477689 |
| C | 0.755646  | -0.155484 | 0.368147  |
| C | -0.741461 | -0.538410 | 0.181620  |
| N | -1.348735 | 0.571688  | -0.671760 |
| C | 1.744466  | -0.764166 | -0.683683 |
| C | 1.333128  | -2.151277 | -1.119633 |
| C | 0.081242  | -2.632129 | -0.946677 |
| C | -1.006020 | -1.919948 | -0.325154 |
| N | 3.020352  | -0.670876 | 0.062424  |
| C | 2.747874  | -1.197064 | 1.397922  |
| C | 1.336454  | -0.662387 | 1.720977  |
| C | -2.244596 | -2.517009 | -0.118323 |
| C | 4.196085  | -1.219100 | -0.583190 |
| H | -1.690900 | 3.289915  | -1.309481 |
| H | 2.567350  | 2.059661  | 0.989393  |
| H | 2.087384  | 4.440767  | 0.421094  |
| H | -0.016707 | 5.047921  | -0.738449 |
| H | 2.081268  | -2.760491 | -1.621321 |
| H | -0.144577 | -3.641282 | -1.297021 |
| H | -1.220711 | -0.415360 | 1.168103  |
| H | 1.839942  | -0.099400 | -1.557462 |
| H | 3.514244  | -0.847405 | 2.101551  |
| H | 2.755347  | -2.301991 | 1.421925  |
| H | 1.363863  | 0.148358  | 2.456530  |
| H | 0.702625  | -1.456691 | 2.128543  |
| H | 4.179517  | -2.319477 | -0.692647 |
| H | 4.309338  | -0.778227 | -1.580513 |
| H | 5.086611  | -0.958312 | 0.002404  |
| H | -1.302059 | 0.271096  | -1.648636 |
| K | -3.901657 | 0.343209  | 0.349161  |
| H | -2.333280 | -3.562957 | -0.477716 |
| O | -3.274945 | -2.000279 | 0.438225  |

G(B3LYP/6-31G(d)) =  
G(M06-2X/6-311+G(d,p)) =  
G(M06-2X/6-311+G(d,p),CPCM/THF) =

0 imaginary frequencies

---

## 5aM

|   |           |           |           |
|---|-----------|-----------|-----------|
| C | -5.683618 | 1.128574  | 0.155420  |
| C | -4.784491 | 0.077868  | -0.099280 |
| C | -3.371047 | 0.363041  | -0.240763 |
| C | -2.913121 | 1.690227  | -0.123624 |
| C | -3.825810 | 2.710992  | 0.129244  |
| C | -5.204152 | 2.430705  | 0.269860  |
| C | -2.768635 | -0.905655 | -0.496191 |
| C | -3.844300 | -1.811914 | -0.477942 |
| N | -5.056582 | -1.258038 | -0.248460 |
| C | -1.316309 | -1.219297 | -0.660175 |
| C | -0.565454 | -1.165596 | 0.691881  |
| N | 0.876328  | -1.460751 | 0.610883  |
| C | 1.782753  | -0.471686 | 0.487107  |
| C | 3.125415  | -0.593738 | 0.201444  |
| C | 3.979817  | 0.540768  | 0.161849  |
| C | 5.327735  | 0.558925  | -0.097009 |
| C | 1.276951  | -2.838592 | 0.383545  |
| C | 6.000402  | 1.843474  | -0.082550 |
| O | 7.196982  | 2.042209  | -0.286467 |
| H | -6.745714 | 0.910067  | 0.259818  |
| H | -1.853355 | 1.928283  | -0.237100 |
| H | -3.475620 | 3.739023  | 0.218938  |
| H | -5.897509 | 3.247681  | 0.468049  |
| H | -3.759918 | -2.888567 | -0.641458 |
| H | -1.190750 | -2.223122 | -1.093711 |
| H | -0.809444 | -0.519515 | -1.345690 |
| H | -0.678776 | -0.169498 | 1.129938  |
| H | -1.020398 | -1.878736 | 1.388069  |
| H | 1.372494  | 0.522724  | 0.655689  |
| H | 3.551342  | -1.571996 | 0.001198  |
| H | 3.507352  | 1.506300  | 0.360868  |
| H | 0.440783  | -3.496439 | 0.628595  |
| H | 1.567316  | -3.016159 | -0.661756 |
| H | 2.129483  | -3.096704 | 1.024002  |
| H | 5.327187  | 2.705692  | 0.140684  |
| C | 6.141470  | -0.675239 | -0.391663 |
| H | 6.106485  | -1.398593 | 0.434783  |
| H | 5.785425  | -1.196922 | -1.290690 |
| H | 7.183899  | -0.386797 | -0.552360 |

G(B3LYP/6-31G(d)) = -843.719037

G(M06-2X/6-311+G(d,p), CPCM/THF) = -843.6605785

0 imaginary frequencies

---



### TS\_5-6aM

|   |           |           |           |
|---|-----------|-----------|-----------|
| C | 0.084353  | 3.242979  | 0.820794  |
| C | 0.821001  | 2.062039  | 0.900240  |
| C | 1.186004  | 1.346269  | -0.273880 |
| C | 0.811048  | 1.830050  | -1.528396 |
| C | 0.083519  | 3.023700  | -1.604255 |
| C | -0.280080 | 3.719765  | -0.441794 |
| C | 1.881109  | 0.143152  | 0.190881  |
| C | 1.982943  | 0.401999  | 1.624052  |
| N | 1.328574  | 1.449590  | 2.059788  |
| C | 3.022224  | -0.538685 | -0.555385 |
| C | 2.566403  | -1.934854 | -1.021774 |
| N | 1.588401  | -2.373385 | -0.044888 |
| C | 0.555309  | -1.354655 | 0.055425  |
| C | -0.403464 | -1.494610 | 1.096660  |
| C | -1.772440 | -1.197997 | 1.080754  |
| C | -2.680749 | -0.820856 | 0.088619  |
| C | -4.051269 | -0.676638 | 0.486154  |
| O | -5.022768 | -0.387835 | -0.229913 |
| C | 1.058923  | -3.699309 | -0.333623 |
| H | -0.192839 | 3.773454  | 1.728399  |
| H | 1.079680  | 1.296697  | -2.439270 |
| H | -0.210315 | 3.413040  | -2.576991 |
| H | -0.857043 | 4.638422  | -0.525763 |
| H | 2.487096  | -0.268512 | 2.319627  |
| H | 3.359130  | 0.066168  | -1.406000 |
| H | 3.882034  | -0.650458 | 0.116434  |
| H | 2.124279  | -1.874899 | -2.039938 |
| H | 3.398056  | -2.649940 | -1.075035 |
| H | 0.153833  | -1.053219 | -0.917842 |
| H | -0.000039 | -1.834933 | 2.050236  |
| H | -2.245741 | -1.330693 | 2.058932  |
| H | -4.222833 | -0.862887 | 1.577652  |
| H | 1.875226  | -4.433701 | -0.304213 |
| H | 0.311609  | -3.961558 | 0.418662  |
| H | 0.575203  | -3.765661 | -1.329383 |
| C | -2.352434 | -0.601754 | -1.363781 |
| H | -1.679626 | 0.253166  | -1.523842 |
| H | -1.864052 | -1.479884 | -1.815815 |
| H | -3.284730 | -0.408921 | -1.904998 |

G(B3LYP/6-31G(d)) = -843.670228

G(M06-2X/6-311+G(d,p),CPCM/THF) = -843.6151183

1 imaginary frequency

---

### 6aM

|   |          |           |           |
|---|----------|-----------|-----------|
| C | 3.181771 | -2.065367 | -0.783028 |
|---|----------|-----------|-----------|

|   |           |           |           |
|---|-----------|-----------|-----------|
| C | 2.560611  | -0.821317 | -0.747616 |
| C | 1.747121  | -0.434555 | 0.334557  |
| C | 1.542114  | -1.303650 | 1.397332  |
| C | 2.162432  | -2.561499 | 1.369240  |
| C | 2.973250  | -2.936136 | 0.293097  |
| C | 1.247984  | 0.954526  | 0.039605  |
| C | 1.923189  | 1.171512  | -1.297513 |
| N | 2.652061  | 0.200160  | -1.734344 |
| C | -0.326950 | 1.142479  | -0.050142 |
| C | -1.026787 | 0.523133  | -1.203764 |
| C | -2.111873 | -0.328697 | -1.191264 |
| C | -2.922332 | -0.923665 | -0.193216 |
| N | -0.372822 | 2.639045  | -0.028845 |
| C | 0.467448  | 3.051930  | 1.082978  |
| C | 1.650277  | 2.052132  | 1.074696  |
| C | -3.988018 | -1.757719 | -0.623387 |
| O | -4.824329 | -2.371448 | 0.073277  |
| C | -1.706370 | 3.203036  | 0.003230  |
| H | 3.803686  | -2.344007 | -1.629318 |
| H | 0.901486  | -1.028604 | 2.231987  |
| H | 2.001949  | -3.256758 | 2.189745  |
| H | 3.441361  | -3.918031 | 0.289595  |
| H | -0.627155 | 0.798983  | -2.180186 |
| H | -2.429111 | -0.620400 | -2.199244 |
| H | 1.802572  | 2.089899  | -1.868221 |
| H | -0.732017 | 0.746782  | 0.895410  |
| H | -0.069338 | 2.988305  | 2.053092  |
| H | 0.788843  | 4.096461  | 0.965462  |
| H | 1.786408  | 1.598670  | 2.061389  |
| H | 2.599600  | 2.529366  | 0.807705  |
| H | -4.055913 | -1.850306 | -1.741162 |
| H | -1.654732 | 4.291868  | -0.136627 |
| H | -2.293309 | 2.760690  | -0.805984 |
| H | -2.238200 | 3.008197  | 0.957424  |
| C | -2.748121 | -0.744725 | 1.292934  |
| H | -1.771315 | -1.102350 | 1.660574  |
| H | -2.839149 | 0.304599  | 1.622090  |
| H | -3.530191 | -1.324723 | 1.795946  |

G(B3LYP/6-31G(d)) = -843.677947

G(M06-2X/6-311+G(d,p),CPCM/THF) = -843.6330021

0 imaginary frequencies

---

### TS\_6-7αM

|   |          |           |           |
|---|----------|-----------|-----------|
| C | 3.118064 | -1.758073 | 0.001293  |
| C | 1.863224 | -1.188611 | -0.297400 |
| C | 1.700761 | 0.219449  | -0.168813 |
| C | 2.744722 | 1.029857  | 0.239769  |

|   |           |           |           |
|---|-----------|-----------|-----------|
| C | 3.999942  | 0.457427  | 0.527277  |
| C | 4.165693  | -0.927240 | 0.406077  |
| C | 0.259642  | 0.532642  | -0.525412 |
| C | -0.241759 | -0.918409 | -0.858422 |
| N | 0.750332  | -1.832132 | -0.769417 |
| C | -0.433926 | 1.348732  | 0.639794  |
| C | -0.975414 | 0.531257  | 1.772170  |
| C | -1.543799 | -0.682651 | 1.621743  |
| C | -1.940004 | -1.285818 | 0.348325  |
| N | -1.373203 | 2.253215  | -0.064209 |
| C | -0.605240 | 2.748738  | -1.198061 |
| C | 0.063761  | 1.484303  | -1.757354 |
| C | -2.037889 | -2.733980 | 0.353673  |
| O | -2.688256 | -3.425225 | -0.434354 |
| C | -1.918591 | 3.292797  | 0.780632  |
| H | 3.254660  | -2.832726 | -0.092385 |
| H | 2.609183  | 2.107887  | 0.335518  |
| H | 4.830873  | 1.087379  | 0.837680  |
| H | 5.135900  | -1.369548 | 0.633322  |
| H | -0.719449 | 0.870525  | 2.775148  |
| H | -1.674019 | -1.282910 | 2.528631  |
| H | -0.919645 | -1.015783 | -1.708110 |
| H | 0.365876  | 1.987218  | 1.071284  |
| H | 0.162320  | 3.486235  | -0.875447 |
| H | -1.258867 | 3.252548  | -1.922502 |
| H | 1.013358  | 1.701385  | -2.255259 |
| H | -0.598122 | 1.012254  | -2.491073 |
| H | -1.415341 | -3.235342 | 1.134904  |
| H | -2.610054 | 3.920265  | 0.203939  |
| H | -2.472311 | 2.836352  | 1.607712  |
| H | -1.137019 | 3.955299  | 1.213202  |
| C | -3.017336 | -0.600817 | -0.484573 |
| H | -4.005068 | -0.695925 | -0.006651 |
| H | -2.809654 | 0.462499  | -0.622347 |
| H | -3.097584 | -1.091010 | -1.461645 |

G(B3LYP/6-31G(d)) = -843.653095

G(M06-2X/6-311+G(d,p),CPCM/THF) = -843.606234

1 imaginary frequency

---

## 7aM

|   |           |           |           |
|---|-----------|-----------|-----------|
| C | -1.835802 | -2.897578 | 0.239106  |
| C | -0.905799 | -1.833332 | 0.435600  |
| C | -1.326552 | -0.515284 | 0.025965  |
| C | -2.549169 | -0.292831 | -0.580621 |
| C | -3.441091 | -1.364784 | -0.797322 |
| C | -3.064254 | -2.646173 | -0.366877 |
| H | -1.559924 | -3.904713 | 0.546420  |

|   |           |           |           |
|---|-----------|-----------|-----------|
| H | -2.833797 | 0.711066  | -0.901226 |
| H | -4.401689 | -1.197304 | -1.279491 |
| H | -3.752274 | -3.479643 | -0.521378 |
| C | -0.232267 | 0.435855  | 0.481684  |
| C | 0.919779  | -0.598342 | 0.795685  |
| N | 0.330816  | -1.914606 | 0.948269  |
| C | 0.107173  | 1.619726  | -0.485170 |
| C | 1.590229  | 1.817357  | -0.697395 |
| H | 1.911728  | 2.836594  | -0.914735 |
| C | 2.482753  | 0.827116  | -0.619107 |
| H | 3.545322  | 1.019744  | -0.758144 |
| C | 2.071290  | -0.587396 | -0.313530 |
| H | 1.428236  | -0.274547 | 1.719213  |
| H | -0.377390 | 1.424130  | -1.458098 |
| N | -0.479460 | 2.844993  | 0.125686  |
| C | -1.359441 | 2.441353  | 1.221804  |
| H | -2.380900 | 2.192186  | 0.875830  |
| H | -1.449581 | 3.254930  | 1.956732  |
| C | -0.668907 | 1.197922  | 1.768566  |
| H | -1.310987 | 0.583852  | 2.405694  |
| H | 0.218012  | 1.496104  | 2.344164  |
| C | 3.215787  | -1.391269 | 0.265814  |
| H | 2.905047  | -2.400992 | 0.606138  |
| O | 4.373247  | -1.022026 | 0.377277  |
| C | -1.071656 | 3.766190  | -0.816965 |
| H | -1.401636 | 4.674391  | -0.294767 |
| H | -0.331512 | 4.067417  | -1.568813 |
| H | -1.949011 | 3.350754  | -1.356684 |
| C | 1.617493  | -1.334901 | -1.593837 |
| H | 1.316901  | -2.354348 | -1.337357 |
| H | 0.754697  | -0.835479 | -2.043582 |
| H | 2.425887  | -1.362411 | -2.336208 |

G(B3LYP/6-31G(d)) = -843.663429

G(M06-2X/6-311+G(d,p),CPCM/THF) = -843.6276615

0 imaginary frequencies

---

### 5aM (with K<sup>+</sup>)

|   |          |           |           |
|---|----------|-----------|-----------|
| C | 5.014339 | 1.243096  | -0.867244 |
| C | 4.142152 | 0.166238  | -0.593511 |
| C | 2.743096 | 0.418414  | -0.330362 |
| C | 2.251038 | 1.742655  | -0.380246 |
| C | 3.127229 | 2.782129  | -0.661667 |
| C | 4.501632 | 2.534274  | -0.901128 |
| C | 2.185884 | -0.860734 | 0.003283  |
| C | 3.270478 | -1.750168 | -0.091750 |
| N | 4.459834 | -1.160372 | -0.413840 |
| C | 0.740238 | -1.198335 | 0.234029  |

|   |           |           |           |
|---|-----------|-----------|-----------|
| C | -0.070599 | -1.228694 | -1.083877 |
| N | -1.492464 | -1.526061 | -0.909785 |
| C | -2.378950 | -0.517530 | -0.700199 |
| C | -3.676205 | -0.621008 | -0.275259 |
| C | -4.512037 | 0.531858  | -0.152418 |
| C | -5.811454 | 0.565083  | 0.266875  |
| C | -1.885806 | -2.898111 | -0.637975 |
| C | -6.463720 | 1.869297  | 0.323810  |
| O | -7.616688 | 2.079238  | 0.679374  |
| H | 6.065938  | 1.049028  | -1.071331 |
| H | 1.198368  | 1.953295  | -0.195112 |
| H | 2.755597  | 3.802984  | -0.707044 |
| H | 5.159939  | 3.369362  | -1.128532 |
| H | 3.227724  | -2.826149 | 0.070839  |
| H | 0.654506  | -2.178613 | 0.723421  |
| H | 0.256944  | -0.472289 | 0.905621  |
| H | 0.014757  | -0.259183 | -1.585108 |
| H | 0.362138  | -1.975411 | -1.759088 |
| H | -1.978616 | 0.469925  | -0.925254 |
| H | -4.091647 | -1.590238 | -0.017836 |
| H | -4.055521 | 1.488181  | -0.420011 |
| H | -1.098142 | -3.571939 | -0.982862 |
| H | -2.060929 | -3.079089 | 0.432848  |
| H | -2.809162 | -3.137565 | -1.177951 |
| H | -5.814293 | 2.719113  | 0.006569  |
| K | 4.389196  | -0.182726 | 2.124973  |
| C | -6.605494 | -0.650108 | 0.672446  |
| H | -6.686111 | -1.377625 | -0.145870 |
| H | -6.150861 | -1.170044 | 1.526152  |
| H | -7.614386 | -0.340970 | 0.957579  |

G(B3LYP/6-31G(d)) = -1443.624096

G(M06-2X/6-311+G(d,p),CPCM/THF) = -1443.543204

0 imaginary frequencies

---

### TS\_5-6aM (with K<sup>+</sup>)

|   |           |           |           |
|---|-----------|-----------|-----------|
| C | -0.950017 | 3.159263  | 0.169497  |
| C | -0.736533 | 1.893910  | -0.379840 |
| C | -1.738144 | 0.886230  | -0.339745 |
| C | -2.984101 | 1.189216  | 0.219377  |
| C | -3.201889 | 2.460007  | 0.757341  |
| C | -2.191638 | 3.433727  | 0.743628  |
| C | -1.150454 | -0.306770 | -0.978540 |
| C | 0.128849  | 0.208418  | -1.434641 |
| N | 0.411230  | 1.441674  | -1.055507 |
| C | -0.723216 | -1.721339 | 0.381528  |
| C | 0.350434  | -2.559657 | -0.116575 |
| C | 1.705559  | -2.320106 | -0.064175 |

|   |           |           |           |
|---|-----------|-----------|-----------|
| C | 2.455571  | -1.288322 | 0.562758  |
| N | -2.012436 | -2.318422 | 0.425649  |
| C | -2.759323 | -2.209676 | -0.831576 |
| C | -1.965810 | -1.295170 | -1.794013 |
| C | 3.800595  | -1.122878 | 0.161358  |
| O | 4.557929  | -0.149061 | 0.446865  |
| C | -2.780843 | -2.122472 | 1.646932  |
| H | -0.175223 | 3.921990  | 0.119985  |
| H | -3.788122 | 0.458579  | 0.229829  |
| H | -4.170631 | 2.699777  | 1.187963  |
| H | -2.385129 | 4.415368  | 1.168180  |
| H | 0.021286  | -3.434437 | -0.673182 |
| H | 2.315821  | -3.020896 | -0.640311 |
| H | 0.857827  | -0.386972 | -1.976285 |
| H | -0.508084 | -1.104087 | 1.250201  |
| H | -3.748911 | -1.779811 | -0.620988 |
| H | -2.936497 | -3.192396 | -1.290842 |
| H | -2.649703 | -0.793668 | -2.489384 |
| H | -1.277924 | -1.898352 | -2.396771 |
| H | 4.197901  | -1.915027 | -0.508680 |
| H | -3.648331 | -2.791257 | 1.635147  |
| H | -2.169041 | -2.399557 | 2.510895  |
| H | -3.140291 | -1.091245 | 1.792116  |
| K | 3.030032  | 1.731162  | -0.345897 |
| C | 1.914464  | -0.403677 | 1.661810  |
| H | 1.180078  | 0.352374  | 1.334647  |
| H | 1.409325  | -1.000366 | 2.431915  |
| H | 2.749011  | 0.113410  | 2.150962  |

G(B3LYP/6-31G(d)) = -1443.581877

G(M06-2X/6-311+G(d,p),CPCM/THF) = -1443.50273

1 imaginary frequency

---

### 6aM (with K<sup>+</sup>)

|   |           |           |           |
|---|-----------|-----------|-----------|
| C | 0.035573  | 3.265547  | -0.112177 |
| C | -0.209891 | 1.970153  | -0.556628 |
| C | -1.292293 | 1.205433  | -0.078841 |
| C | -2.129371 | 1.743590  | 0.892571  |
| C | -1.886898 | 3.046170  | 1.354550  |
| C | -0.822349 | 3.801374  | 0.855589  |
| C | -1.249885 | -0.127942 | -0.800641 |
| C | -0.005490 | 0.085661  | -1.625134 |
| N | 0.568661  | 1.240063  | -1.501469 |
| C | -1.223861 | -1.422988 | 0.155282  |
| C | -0.252064 | -2.507473 | -0.243599 |
| C | 1.097823  | -2.545565 | -0.079536 |
| C | 2.018969  | -1.653295 | 0.577641  |
| N | -2.608270 | -1.947414 | 0.071786  |

|   |           |           |           |
|---|-----------|-----------|-----------|
| C | -3.471344 | -1.042815 | -0.664998 |
| C | -2.516670 | -0.396833 | -1.666465 |
| C | 3.382662  | -1.771603 | 0.272182  |
| O | 4.316401  | -0.969417 | 0.608685  |
| C | -3.141560 | -2.469306 | 1.311574  |
| H | 0.857728  | 3.848759  | -0.521244 |
| H | -2.956257 | 1.173410  | 1.304775  |
| H | -2.538149 | 3.472563  | 2.112508  |
| H | -0.658717 | 4.811190  | 1.221671  |
| H | -0.719966 | -3.303884 | -0.817954 |
| H | 1.591524  | -3.381773 | -0.583809 |
| H | 0.398253  | -0.678857 | -2.281657 |
| H | -1.012541 | -1.045702 | 1.165247  |
| H | -3.948229 | -0.269249 | -0.030511 |
| H | -4.282914 | -1.594882 | -1.157519 |
| H | -2.909959 | 0.513413  | -2.127460 |
| H | -2.271045 | -1.114695 | -2.456933 |
| H | 3.649940  | -2.633117 | -0.378312 |
| H | -4.087810 | -2.989138 | 1.119944  |
| H | -2.438686 | -3.194382 | 1.734261  |
| H | -3.332753 | -1.688500 | 2.076283  |
| K | 3.175102  | 1.004790  | -0.456518 |
| C | 1.598811  | -0.681726 | 1.661112  |
| H | 2.496305  | -0.305926 | 2.168001  |
| H | 1.005728  | 0.187267  | 1.328273  |
| H | 0.983705  | -1.181008 | 2.421678  |

G(B3LYP/6-31G(d)) = -1443.59125

G(M06-2X/6-311+G(d,p),CPCM/THF) = -1443.521562

0 imaginary frequencies

---

### TS\_6-7 $\alpha$ M (with K<sup>+</sup>)

|   |           |           |           |
|---|-----------|-----------|-----------|
| C | -3.005679 | -1.552644 | -0.136191 |
| C | -1.737244 | -0.969135 | -0.285988 |
| C | -0.580678 | -1.752945 | -0.027711 |
| C | -0.682530 | -3.071898 | 0.381921  |
| C | -1.954707 | -3.645429 | 0.547369  |
| C | -3.096774 | -2.884768 | 0.279082  |
| C | 0.608856  | -0.899682 | -0.406657 |
| C | -0.077431 | 0.488461  | -0.455643 |
| N | -1.439732 | 0.322564  | -0.691614 |
| C | 1.923319  | -0.973847 | 0.396920  |
| C | 1.875564  | -0.383502 | 1.774572  |
| C | 1.084205  | 0.634931  | 2.121473  |
| C | 0.175292  | 1.403354  | 1.217743  |
| N | 2.863881  | -0.283168 | -0.509506 |
| C | 2.628558  | -0.854923 | -1.839758 |
| C | 1.133588  | -1.246560 | -1.844695 |

|   |           |           |           |
|---|-----------|-----------|-----------|
| C | 0.770403  | 2.613776  | 0.652290  |
| O | 0.126207  | 3.545997  | 0.135612  |
| C | 4.254557  | -0.314312 | -0.100351 |
| H | -3.903360 | -0.970762 | -0.337029 |
| H | 0.209772  | -3.666602 | 0.572604  |
| H | -2.049070 | -4.676606 | 0.876540  |
| H | -4.079706 | -3.335386 | 0.402195  |
| H | 2.488862  | -0.857724 | 2.538861  |
| H | 1.068665  | 0.937641  | 3.171692  |
| H | 0.420526  | 1.180253  | -1.138194 |
| H | 2.206110  | -2.044011 | 0.496122  |
| H | 3.255392  | -1.750705 | -2.012459 |
| H | 2.894362  | -0.123149 | -2.613212 |
| H | 1.016538  | -2.320097 | -2.018497 |
| H | 0.551145  | -0.729802 | -2.612906 |
| H | 1.874469  | 2.623205  | 0.585406  |
| H | 4.861156  | 0.244345  | -0.822523 |
| H | 4.367212  | 0.163570  | 0.877904  |
| H | 4.665785  | -1.342567 | -0.036332 |
| K | -2.050572 | 2.822278  | -1.133460 |
| C | -1.193895 | 1.629008  | 1.862083  |
| H | -1.106699 | 1.630888  | 2.955475  |
| H | -1.610427 | 2.604488  | 1.580994  |
| H | -1.900987 | 0.846668  | 1.573284  |

G(B3LYP/6-31G(d)) = -1443.566880

G(M06-2X/6-311+G(d,p),CPCM/THF) = -1443.499972

1 imaginary frequency

---

### 7αM (with K<sup>+</sup>)

|   |           |           |           |
|---|-----------|-----------|-----------|
| C | -3.005679 | -1.552644 | -0.136191 |
| C | -1.737244 | -0.969135 | -0.285988 |
| C | -0.580678 | -1.752945 | -0.027711 |
| C | -0.682530 | -3.071898 | 0.381921  |
| C | -1.954707 | -3.645429 | 0.547369  |
| C | -3.096774 | -2.884768 | 0.279082  |
| C | 0.608856  | -0.899682 | -0.406657 |
| C | -0.077431 | 0.488461  | -0.455643 |
| N | -1.439732 | 0.322564  | -0.691614 |
| C | 1.923319  | -0.973847 | 0.396920  |
| C | 1.875564  | -0.383502 | 1.774572  |
| C | 1.084205  | 0.634931  | 2.121473  |
| C | 0.175292  | 1.403354  | 1.217743  |
| N | 2.863881  | -0.283168 | -0.509506 |
| C | 2.628558  | -0.854923 | -1.839758 |
| C | 1.133588  | -1.246560 | -1.844695 |
| C | 0.770403  | 2.613776  | 0.652290  |
| O | 0.126207  | 3.545997  | 0.135612  |



|   |           |           |           |
|---|-----------|-----------|-----------|
| C | 4.254557  | -0.314312 | -0.100351 |
| H | -3.903360 | -0.970762 | -0.337029 |
| H | 0.209772  | -3.666602 | 0.572604  |
| H | -2.049070 | -4.676606 | 0.876540  |
| H | -4.079706 | -3.335386 | 0.402195  |
| H | 2.488862  | -0.857724 | 2.538861  |
| H | 1.068665  | 0.937641  | 3.171692  |
| H | 0.420526  | 1.180253  | -1.138194 |
| H | 2.206110  | -2.044011 | 0.496122  |
| H | 3.255392  | -1.750705 | -2.012459 |
| H | 2.894362  | -0.123149 | -2.613212 |
| H | 1.016538  | -2.320097 | -2.018497 |
| H | 0.551145  | -0.729802 | -2.612906 |
| H | 1.874469  | 2.623205  | 0.585406  |
| H | 4.861156  | 0.244345  | -0.822523 |
| H | 4.367212  | 0.163570  | 0.877904  |
| H | 4.665785  | -1.342567 | -0.036332 |
| K | -2.050572 | 2.822278  | -1.133460 |
| C | -1.193895 | 1.629008  | 1.862083  |
| H | -1.106699 | 1.630888  | 2.955475  |
| H | -1.610427 | 2.604488  | 1.580994  |
| H | -1.900987 | 0.846668  | 1.573284  |

G(B3LYP/6-31G(d)) = -1443.578718

G(M06-2X/6-311+G(d,p),CPCM/THF) = -1443.519746

0 imaginary frequencies

---

## 9

|   |           |           |           |
|---|-----------|-----------|-----------|
| C | 4.887402  | -1.833249 | 0.671094  |
| C | 3.535168  | -1.496525 | 0.676910  |
| C | 2.601798  | -2.204940 | -0.091905 |
| C | 3.020845  | -3.256928 | -0.901675 |
| C | 4.379509  | -3.598957 | -0.926332 |
| C | 5.298213  | -2.899312 | -0.137318 |
| C | 1.207816  | -1.697689 | 0.225859  |
| C | 1.528978  | -0.323403 | 0.903772  |
| N | 2.927180  | -0.430637 | 1.390503  |
| C | 0.199588  | -1.600725 | -0.933984 |
| C | 1.037663  | 0.764715  | -1.332744 |
| C | 1.460603  | 0.878389  | -0.053248 |
| N | -1.081074 | -1.407468 | -0.228621 |
| C | -1.053492 | -2.317994 | 0.942163  |
| C | 0.437691  | -2.620714 | 1.206046  |
| C | 2.003217  | 2.092942  | 0.511522  |
| C | -2.273656 | -1.600346 | -1.067140 |
| C | 0.531995  | -0.499836 | -1.940631 |
| N | 1.827147  | 3.334039  | 0.167038  |
| C | 0.956947  | 3.871362  | -0.910251 |

|    |           |           |           |
|----|-----------|-----------|-----------|
| C  | 0.777364  | 5.344130  | -0.531397 |
| C  | 2.122272  | 5.704568  | 0.119348  |
| C  | 2.468015  | 4.454534  | 0.931557  |
| C  | -3.574783 | -1.281589 | -0.337102 |
| C  | -4.389913 | -2.313924 | -0.046191 |
| C  | -5.708594 | -2.303707 | 0.675176  |
| Si | -3.969250 | 0.540967  | 0.070244  |
| C  | -2.696925 | 1.665692  | -0.770221 |
| C  | -3.905344 | 0.847432  | 1.941577  |
| C  | -5.670938 | 1.042474  | -0.606799 |
| H  | 5.601971  | -1.278377 | 1.272375  |
| H  | 2.307069  | -3.819908 | -1.498065 |
| H  | 4.718791  | -4.415795 | -1.556702 |
| H  | 6.348442  | -3.177234 | -0.159025 |
| H  | 1.119501  | 1.606793  | -2.011405 |
| H  | 0.860636  | -0.137195 | 1.748723  |
| H  | 0.204419  | -2.565754 | -1.477340 |
| H  | -1.595545 | -3.252498 | 0.730658  |
| H  | -1.551204 | -1.846482 | 1.795357  |
| H  | 0.665383  | -3.664221 | 0.968301  |
| H  | 0.735233  | -2.453459 | 2.245988  |
| H  | 2.642803  | 1.950235  | 1.379885  |
| H  | -2.310844 | -2.641474 | -1.445905 |
| H  | -2.174118 | -0.950624 | -1.944256 |
| H  | 3.008356  | -0.506785 | 2.400581  |
| H  | 1.300578  | -0.864545 | -2.639572 |
| H  | -0.329350 | -0.266549 | -2.577806 |
| H  | 1.484188  | 3.770776  | -1.864695 |
| H  | 0.030263  | 3.294236  | -0.950864 |
| H  | 0.546283  | 5.955449  | -1.406400 |
| H  | -0.041760 | 5.450603  | 0.187623  |
| H  | 2.883644  | 5.882025  | -0.647339 |
| H  | 2.065542  | 6.590421  | 0.755565  |
| H  | 3.537723  | 4.260297  | 1.026391  |
| H  | 2.016946  | 4.477117  | 1.928093  |
| H  | -4.075891 | -3.314881 | -0.359418 |
| H  | -6.521681 | -2.617807 | 0.006088  |
| H  | -5.692235 | -3.027126 | 1.501026  |
| H  | -5.970845 | -1.328025 | 1.089826  |
| H  | -2.883050 | 2.711934  | -0.497105 |
| H  | -1.680074 | 1.402963  | -0.462447 |
| H  | -2.751555 | 1.595339  | -1.863477 |
| H  | -4.135040 | 1.896300  | 2.168279  |
| H  | -4.624580 | 0.225291  | 2.486378  |
| H  | -2.908356 | 0.630463  | 2.343834  |
| H  | -5.725826 | 0.866395  | -1.688068 |
| H  | -6.502337 | 0.504042  | -0.140538 |
| H  | -5.835391 | 2.114601  | -0.438911 |

G(B3LYP/6-31G(d),CPCM/THF) = -1466.70441

G(M06-2X/6-311+G(d,p),CPCM/THF) = -1466.478814

0 imaginary frequencies

---

11

|    |           |           |           |
|----|-----------|-----------|-----------|
| C  | -3.303961 | 3.071157  | 0.458798  |
| C  | -2.525119 | 1.944627  | 0.720295  |
| C  | -1.212143 | 1.826597  | 0.228065  |
| C  | -0.666824 | 2.847561  | -0.539399 |
| C  | -1.438598 | 3.988020  | -0.814293 |
| C  | -2.738791 | 4.093356  | -0.315470 |
| C  | -0.618642 | 0.526122  | 0.761223  |
| C  | -1.921531 | -0.257713 | 1.117993  |
| N  | -2.844548 | 0.811842  | 1.478724  |
| C  | 0.384161  | -0.200243 | -0.198570 |
| C  | -1.272630 | -2.047428 | -0.531045 |
| C  | -2.400162 | -1.112002 | -0.133778 |
| N  | 1.696151  | -0.180651 | 0.485779  |
| C  | 1.658547  | 0.900612  | 1.472522  |
| C  | 0.246338  | 0.795594  | 2.033251  |
| C  | -3.615189 | -1.877131 | 0.230309  |
| C  | 2.840488  | -0.137561 | -0.422290 |
| C  | -0.011546 | -1.613389 | -0.539003 |
| N  | -4.812729 | -1.630635 | -0.175178 |
| C  | -6.008780 | -2.421362 | 0.256906  |
| C  | -7.047722 | -2.117144 | -0.821991 |
| C  | -6.742618 | -0.657153 | -1.195602 |
| C  | -5.211261 | -0.584107 | -1.173534 |
| C  | 4.167295  | -0.622022 | 0.169161  |
| C  | 4.161028  | -1.330494 | 1.313124  |
| C  | 5.327404  | -1.923099 | 2.054721  |
| Si | 5.739572  | -0.210229 | -0.830683 |
| C  | 6.923404  | 0.879314  | 0.174646  |
| C  | 5.257371  | 0.754320  | -2.392362 |
| C  | 6.625666  | -1.791980 | -1.391231 |
| H  | -4.317806 | 3.155046  | 0.840496  |
| H  | 0.343441  | 2.770680  | -0.932415 |
| H  | -1.021646 | 4.788574  | -1.417936 |
| H  | -3.330285 | 4.978019  | -0.535501 |
| H  | -1.513059 | -3.070253 | -0.807543 |
| H  | -1.762644 | -0.941639 | 1.954755  |
| H  | 0.430411  | 0.375637  | -1.140901 |
| H  | 1.824796  | 1.891661  | 1.008353  |
| H  | 2.432431  | 0.759848  | 2.232439  |
| H  | -0.075515 | 1.689280  | 2.573050  |
| H  | 0.185228  | -0.061416 | 2.713416  |
| H  | -3.508279 | -2.712528 | 0.921661  |
| H  | 2.963479  | 0.885360  | -0.826575 |
| H  | 2.603141  | -0.763332 | -1.294447 |
| H  | -3.818668 | 0.589607  | 1.643652  |
| H  | 0.791146  | -2.288042 | -0.828388 |

|   |           |           |           |
|---|-----------|-----------|-----------|
| H | -5.731722 | -3.471938 | 0.351016  |
| H | -6.316173 | -2.037399 | 1.234448  |
| H | -6.903960 | -2.777353 | -1.683537 |
| H | -8.063807 | -2.257602 | -0.447572 |
| H | -7.136143 | -0.375277 | -2.174328 |
| H | -7.162849 | 0.024784  | -0.449502 |
| H | -4.771475 | -0.868440 | -2.133942 |
| H | -4.817052 | 0.387548  | -0.874676 |
| H | 3.192095  | -1.518523 | 1.780597  |
| H | 6.293601  | -1.723479 | 1.585367  |
| H | 5.367488  | -1.537005 | 3.082614  |
| H | 5.215261  | -3.012873 | 2.141148  |
| H | 7.801871  | 1.141943  | -0.428359 |
| H | 6.435396  | 1.814865  | 0.473813  |
| H | 7.281134  | 0.386070  | 1.085039  |
| H | 6.152834  | 0.939433  | -2.998843 |
| H | 4.545458  | 0.203727  | -3.018880 |
| H | 4.813167  | 1.729000  | -2.158922 |
| H | 6.975681  | -2.402656 | -0.552035 |
| H | 5.962727  | -2.416437 | -2.002497 |
| H | 7.499216  | -1.537504 | -2.004808 |
| H | -2.622159 | -0.404773 | -0.940639 |

G(B3LYP/6-31G(d),CPCM/THF) = -1466.69301

G(M06-2X/6-311+G(d,p),CPCM/THF) = -1466.468364

0 imaginary frequencies

---

## 12

|   |           |           |           |
|---|-----------|-----------|-----------|
| C | 2.766083  | 3.518890  | 1.152296  |
| C | 1.428308  | 3.112001  | 1.088226  |
| C | 0.704757  | 3.058600  | -0.138145 |
| C | 1.359842  | 3.440488  | -1.325313 |
| C | 2.689286  | 3.844380  | -1.265898 |
| C | 3.385947  | 3.880659  | -0.039340 |
| C | -0.629816 | 2.598151  | 0.173470  |
| C | -0.660805 | 2.410792  | 1.535663  |
| N | 0.567041  | 2.711916  | 2.087206  |
| C | -0.702807 | -0.886180 | -0.988106 |
| C | 1.582295  | -1.558670 | -0.610606 |
| C | 2.962017  | -1.375848 | -0.517031 |
| N | -1.727920 | -0.101207 | -1.320393 |
| C | -1.559873 | 1.269872  | -1.830763 |
| C | -1.761825 | 2.399242  | -0.793123 |
| C | 3.789925  | -2.439876 | -0.159846 |
| C | -3.093730 | -0.666309 | -1.281235 |
| C | 0.653496  | -0.572653 | -0.947870 |
| N | 5.105674  | -2.398982 | -0.021449 |
| C | 5.929736  | -1.187686 | -0.212388 |

|    |           |           |           |
|----|-----------|-----------|-----------|
| C  | 7.372651  | -1.694542 | -0.063640 |
| C  | 7.235811  | -2.925311 | 0.850061  |
| C  | 5.926623  | -3.563798 | 0.375880  |
| C  | -3.769655 | -0.787362 | 0.084750  |
| C  | -3.104624 | -0.499156 | 1.216809  |
| C  | -3.601978 | -0.591153 | 2.633221  |
| Si | -5.579641 | -1.417345 | 0.024204  |
| C  | -5.734815 | -3.082430 | 0.915473  |
| C  | -6.077983 | -1.677071 | -1.786521 |
| C  | -6.757172 | -0.136805 | 0.774333  |
| H  | 3.298759  | 3.553984  | 2.098637  |
| H  | 0.835165  | 3.432118  | -2.277475 |
| H  | 3.200918  | 4.142376  | -2.176996 |
| H  | 4.423547  | 4.202630  | -0.024152 |
| H  | 1.197020  | -2.557091 | -0.397830 |
| H  | -1.478965 | 2.096022  | 2.168475  |
| H  | -0.994653 | -1.900150 | -0.720872 |
| H  | -2.292229 | 1.393693  | -2.633898 |
| H  | -0.571414 | 1.341184  | -2.288515 |
| H  | -2.697228 | 2.222610  | -0.251258 |
| H  | -1.913996 | 3.316752  | -1.378766 |
| H  | 3.338720  | -3.410807 | 0.035509  |
| H  | -3.050369 | -1.655467 | -1.754941 |
| H  | -3.701826 | -0.046556 | -1.945801 |
| H  | 0.788455  | 2.665705  | 3.070812  |
| H  | 1.001074  | 0.435004  | -1.147830 |
| H  | 5.727270  | -0.743409 | -1.191685 |
| H  | 5.667906  | -0.453334 | 0.558924  |
| H  | 7.768292  | -1.990742 | -1.041220 |
| H  | 8.031585  | -0.926332 | 0.347957  |
| H  | 8.079658  | -3.614711 | 0.768838  |
| H  | 7.145162  | -2.617015 | 1.897552  |
| H  | 6.089400  | -4.208253 | -0.496810 |
| H  | 5.409334  | -4.141932 | 1.145506  |
| H  | -2.072325 | -0.152722 | 1.145661  |
| H  | -3.545993 | 0.388933  | 3.126299  |
| H  | -4.631085 | -0.946719 | 2.713192  |
| H  | -2.964447 | -1.267663 | 3.218101  |
| H  | -6.761880 | -3.458927 | 0.829615  |
| H  | -5.069721 | -3.829158 | 0.465257  |
| H  | -5.491828 | -3.020031 | 1.981581  |
| H  | -7.109855 | -2.047420 | -1.826247 |
| H  | -6.044338 | -0.748199 | -2.368108 |
| H  | -5.447617 | -2.416069 | -2.295022 |
| H  | -6.561545 | 0.052464  | 1.835078  |
| H  | -6.681328 | 0.820697  | 0.245252  |
| H  | -7.794199 | -0.483766 | 0.683969  |
| H  | 3.385827  | -0.396305 | -0.717342 |

G(B3LYP/6-31G(d),CPCM/THF) = -1466.745834

G(M06-2X/6-311+G(d,p),CPCM/THF) = -1466.498548

0 imaginary frequencies

---

13

|    |           |           |           |
|----|-----------|-----------|-----------|
| C  | -3.586493 | -3.691949 | -0.596811 |
| C  | -2.250698 | -3.324776 | -0.520078 |
| C  | -1.707399 | -2.537336 | 0.501387  |
| C  | -2.543390 | -2.087303 | 1.517074  |
| C  | -3.898581 | -2.439327 | 1.468884  |
| C  | -4.412846 | -3.226672 | 0.430032  |
| C  | -0.232549 | -2.348226 | 0.238674  |
| C  | -0.058801 | -3.132592 | -1.015207 |
| N  | -1.184102 | -3.654144 | -1.403369 |
| C  | 0.223781  | -0.839244 | -0.019469 |
| C  | -1.138118 | 0.583983  | -1.639297 |
| C  | -2.102496 | 1.177911  | -0.751504 |
| N  | 1.669762  | -0.952057 | 0.196408  |
| C  | 1.831872  | -1.713296 | 1.435834  |
| C  | 0.759879  | -2.819608 | 1.362111  |
| C  | -3.049115 | 2.044994  | -1.227002 |
| C  | 2.391997  | 0.322469  | 0.177870  |
| C  | -0.130007 | -0.280954 | -1.364492 |
| N  | -4.004934 | 2.679507  | -0.513125 |
| C  | -4.988552 | 3.598221  | -1.100488 |
| C  | -5.513527 | 4.370430  | 0.116179  |
| C  | -5.453720 | 3.323707  | 1.243156  |
| C  | -4.172751 | 2.529140  | 0.934330  |
| C  | 3.894647  | 0.216450  | -0.092872 |
| C  | 4.400205  | -0.924920 | -0.594756 |
| C  | 5.825092  | -1.238468 | -0.959598 |
| Si | 4.925483  | 1.785444  | 0.256992  |
| C  | 6.246124  | 1.458637  | 1.579058  |
| C  | 3.785205  | 3.152861  | 0.911861  |
| C  | 5.734300  | 2.431463  | -1.332795 |
| H  | -3.970104 | -4.305174 | -1.405257 |
| H  | -2.162625 | -1.480233 | 2.332750  |
| H  | -4.564029 | -2.097290 | 2.255420  |
| H  | -5.467107 | -3.483566 | 0.421574  |
| H  | -1.239148 | 0.878396  | -2.685714 |
| H  | 0.857894  | -3.272233 | -1.573826 |
| H  | -0.267900 | -0.260689 | 0.783624  |
| H  | 1.652515  | -1.077280 | 2.321671  |
| H  | 2.846222  | -2.111579 | 1.513854  |
| H  | 0.216552  | -2.924959 | 2.303219  |
| H  | 1.188627  | -3.796480 | 1.123964  |
| H  | -3.065129 | 2.276621  | -2.291229 |
| H  | 2.219537  | 0.861605  | 1.127240  |
| H  | 1.932952  | 0.944776  | -0.601547 |
| H  | -1.293752 | -4.220705 | -2.241951 |

|   |           |           |           |
|---|-----------|-----------|-----------|
| H | 0.503662  | -0.617411 | -2.183684 |
| H | -4.515514 | 4.241789  | -1.849405 |
| H | -5.798457 | 3.040664  | -1.594206 |
| H | -4.845985 | 5.210160  | 0.341494  |
| H | -6.518613 | 4.769221  | -0.046152 |
| H | -5.432725 | 3.768129  | 2.241831  |
| H | -6.325936 | 2.662142  | 1.188695  |
| H | -3.296509 | 2.937024  | 1.459630  |
| H | -4.256366 | 1.469363  | 1.207530  |
| H | 3.703192  | -1.746048 | -0.776571 |
| H | 6.517637  | -0.415033 | -0.770402 |
| H | 6.183548  | -2.113414 | -0.399961 |
| H | 5.901118  | -1.502804 | -2.023516 |
| H | 6.793817  | 2.383252  | 1.801443  |
| H | 5.786863  | 1.113110  | 2.513166  |
| H | 6.979347  | 0.705307  | 1.271184  |
| H | 4.365810  | 4.071967  | 1.060432  |
| H | 2.973148  | 3.387632  | 0.213412  |
| H | 3.332700  | 2.892775  | 1.875969  |
| H | 6.421745  | 1.708406  | -1.784644 |
| H | 4.974350  | 2.680513  | -2.083487 |
| H | 6.303828  | 3.345643  | -1.122600 |
| H | -2.081353 | 0.933482  | 0.306274  |

G(B3LYP/6-31G(d),CPCM/THF) = -1466.688396

G(M06-2X/6-311+G(d,p),CPCM/THF) = -1466.450669

0 imaginary frequencies

---

## 14

|   |           |           |           |
|---|-----------|-----------|-----------|
| C | 4.177578  | 2.052774  | -0.265549 |
| C | 2.876916  | 1.594387  | -0.421356 |
| C | 1.744996  | 2.409370  | -0.286798 |
| C | 1.910394  | 3.754052  | 0.022507  |
| C | 3.213223  | 4.243949  | 0.187105  |
| C | 4.327716  | 3.407991  | 0.046579  |
| C | 0.513244  | 1.560344  | -0.509300 |
| C | 1.135096  | 0.239707  | -0.819035 |
| N | 2.431561  | 0.282490  | -0.750578 |
| C | -0.434602 | 1.413650  | 0.751395  |
| C | 0.386732  | -0.833139 | 1.783550  |
| C | 1.576653  | -1.380557 | 1.710422  |
| N | -1.652824 | 0.871300  | 0.146373  |
| C | -1.898576 | 1.752096  | -1.006839 |
| C | -0.502876 | 2.021438  | -1.608857 |
| C | 2.775744  | -1.903597 | 1.603121  |
| C | -2.794886 | 0.792996  | 1.079823  |
| C | 0.141979  | 0.653533  | 1.964075  |
| N | 3.458051  | -2.084349 | 0.342731  |

|    |           |           |           |
|----|-----------|-----------|-----------|
| C  | 3.113767  | -3.353171 | -0.361188 |
| C  | 4.192190  | -3.461088 | -1.448495 |
| C  | 5.423126  | -2.712257 | -0.859187 |
| C  | 4.934430  | -2.141547 | 0.484981  |
| C  | -4.097843 | 0.362303  | 0.412951  |
| C  | -5.071805 | 1.290105  | 0.328875  |
| C  | -6.444830 | 1.170311  | -0.270103 |
| Si | -4.295925 | -1.437599 | -0.199387 |
| C  | -5.821456 | -2.253723 | 0.581261  |
| C  | -2.799420 | -2.470722 | 0.329013  |
| C  | -4.426626 | -1.492143 | -2.090871 |
| H  | 5.034990  | 1.399152  | -0.385401 |
| H  | 1.056531  | 4.415717  | 0.133603  |
| H  | 3.360717  | 5.292571  | 0.426128  |
| H  | 5.324877  | 3.816001  | 0.177507  |
| H  | -0.492693 | -1.472789 | 1.713923  |
| H  | 0.606835  | -0.675501 | -1.046395 |
| H  | -0.599027 | 2.454366  | 1.096510  |
| H  | -2.356218 | 2.705017  | -0.688284 |
| H  | -2.581402 | 1.279392  | -1.714744 |
| H  | -0.353324 | 3.082571  | -1.818131 |
| H  | -0.341457 | 1.479826  | -2.544167 |
| H  | 3.313357  | -2.237864 | 2.494137  |
| H  | -2.946303 | 1.774280  | 1.569911  |
| H  | -2.523007 | 0.081373  | 1.867992  |
| H  | 3.000545  | -0.606308 | -0.634550 |
| H  | -0.547926 | 0.796970  | 2.804408  |
| H  | 3.173794  | -4.198253 | 0.341514  |
| H  | 2.093095  | -3.305882 | -0.748421 |
| H  | 4.409660  | -4.505630 | -1.686386 |
| H  | 3.854255  | -2.977083 | -2.370019 |
| H  | 6.279247  | -3.375153 | -0.708313 |
| H  | 5.746451  | -1.910890 | -1.529906 |
| H  | 5.202417  | -2.812087 | 1.317130  |
| H  | 5.331655  | -1.148727 | 0.715129  |
| H  | -4.867068 | 2.283396  | 0.740993  |
| H  | -6.624320 | 0.214592  | -0.766532 |
| H  | -7.216578 | 1.302908  | 0.500563  |
| H  | -6.604790 | 1.968621  | -1.006866 |
| H  | -5.869422 | -3.309025 | 0.283631  |
| H  | -5.760446 | -2.222582 | 1.675964  |
| H  | -6.766211 | -1.784712 | 0.288201  |
| H  | -2.711146 | -2.524122 | 1.421144  |
| H  | -2.907213 | -3.498035 | -0.040366 |
| H  | -1.866004 | -2.062591 | -0.070603 |
| H  | -5.289206 | -0.929558 | -2.465396 |
| H  | -3.528569 | -1.074583 | -2.561983 |
| H  | -4.531014 | -2.528369 | -2.436335 |
| H  | 1.075162  | 1.150914  | 2.247655  |

G(B3LYP/6-31G(d),CPCM/THF) = -1466.649633



G(M06-2X/6-311+G(d,p),CPCM/THF) = -1466.420276

0 imaginary frequencies

---

### TS\_9-14

|    |           |           |           |
|----|-----------|-----------|-----------|
| C  | -2.701870 | 4.149354  | -0.064818 |
| C  | -2.138634 | 2.949787  | 0.348439  |
| C  | -0.820215 | 2.568708  | 0.070153  |
| C  | -0.018634 | 3.424967  | -0.677075 |
| C  | -0.559167 | 4.643553  | -1.109631 |
| C  | -1.877685 | 5.001993  | -0.805517 |
| C  | -0.550799 | 1.226280  | 0.730787  |
| C  | -1.931870 | 0.863659  | 1.212245  |
| N  | -2.735387 | 1.899588  | 1.086264  |
| C  | 0.278159  | 0.205741  | -0.135153 |
| C  | -1.673711 | -1.053896 | -1.138846 |
| C  | -2.861542 | -0.816824 | -0.619237 |
| N  | 1.571153  | 0.052006  | 0.560186  |
| C  | 1.749650  | 1.177572  | 1.472100  |
| C  | 0.346688  | 1.392658  | 2.024333  |
| C  | -4.193815 | -0.670703 | -0.521736 |
| C  | 2.706506  | -0.200143 | -0.328279 |
| C  | -0.406157 | -1.159298 | -0.322788 |
| N  | -5.112272 | -1.666437 | -0.472077 |
| C  | -6.513643 | -1.465048 | -0.070614 |
| C  | -6.942554 | -2.855811 | 0.417428  |
| C  | -6.106557 | -3.808056 | -0.456587 |
| C  | -4.757724 | -3.084390 | -0.587720 |
| C  | 3.893250  | -0.926471 | 0.310514  |
| C  | 3.740104  | -1.525172 | 1.505611  |
| C  | 4.753348  | -2.303932 | 2.298227  |
| Si | 5.506709  | -0.962781 | -0.710223 |
| C  | 6.920073  | -0.096616 | 0.212266  |
| C  | 5.233462  | -0.040779 | -2.345631 |
| C  | 5.997050  | -2.744929 | -1.137445 |
| H  | -3.729010 | 4.411308  | 0.167419  |
| H  | 1.004142  | 3.163904  | -0.928776 |
| H  | 0.057199  | 5.320790  | -1.692629 |
| H  | -2.271755 | 5.951107  | -1.154786 |
| H  | -1.550731 | -1.125043 | -2.224834 |
| H  | -2.190744 | 0.035848  | 1.854326  |
| H  | 0.412220  | 0.662912  | -1.128524 |
| H  | 2.115072  | 2.086740  | 0.958973  |
| H  | 2.468429  | 0.933998  | 2.259945  |
| H  | 0.195710  | 2.363662  | 2.499987  |
| H  | 0.108984  | 0.604782  | 2.745315  |
| H  | -4.611188 | 0.328483  | -0.396130 |
| H  | 3.051267  | 0.750511  | -0.776469 |
| H  | 2.345018  | -0.802452 | -1.172842 |

|   |           |           |           |
|---|-----------|-----------|-----------|
| H | -3.675459 | 1.936003  | 1.467945  |
| H | -0.606579 | -1.596917 | 0.660934  |
| H | -6.588956 | -0.694557 | 0.703479  |
| H | -7.116482 | -1.143243 | -0.931541 |
| H | -6.675938 | -2.978860 | 1.473463  |
| H | -8.019596 | -3.015667 | 0.318104  |
| H | -5.998590 | -4.805403 | -0.022239 |
| H | -6.569279 | -3.918879 | -1.443884 |
| H | -4.059925 | -3.358388 | 0.218444  |
| H | -4.255504 | -3.283162 | -1.540379 |
| H | 2.758968  | -1.457318 | 1.980321  |
| H | 5.731976  | -2.366584 | 1.816740  |
| H | 4.895390  | -1.854131 | 3.290547  |
| H | 4.399306  | -3.329153 | 2.474176  |
| H | 7.828349  | -0.092328 | -0.403638 |
| H | 6.662883  | 0.947124  | 0.430006  |
| H | 7.165809  | -0.583006 | 1.162610  |
| H | 6.141349  | -0.107418 | -2.957995 |
| H | 4.411132  | -0.469046 | -2.931127 |
| H | 5.017705  | 1.023270  | -2.193762 |
| H | 6.214512  | -3.350686 | -0.251211 |
| H | 5.196901  | -3.247314 | -1.694548 |
| H | 6.893458  | -2.748632 | -1.770471 |
| H | 0.303304  | -1.822653 | -0.830592 |

G(B3LYP/6-31G(d),CPCM/THF) = -1466.648734

G(M06-2X/6-311+G(d,p),CPCM/THF) = -1466.442218

1 imaginary frequency

---

### TS\_11-13

|   |           |           |           |
|---|-----------|-----------|-----------|
| C | 3.044461  | 3.165676  | -0.352902 |
| C | 2.364239  | 2.051683  | -0.826953 |
| C | 1.035472  | 1.747064  | -0.493130 |
| C | 0.354963  | 2.594216  | 0.375718  |
| C | 1.016377  | 3.726975  | 0.869989  |
| C | 2.337898  | 4.011348  | 0.508250  |
| C | 0.629762  | 0.482976  | -1.234065 |
| C | 1.951049  | 0.051174  | -1.796449 |
| N | 2.838356  | 1.021218  | -1.669918 |
| C | -0.248184 | -0.562989 | -0.410964 |
| C | 1.338398  | -2.506521 | -0.510438 |
| C | 2.439962  | -1.730944 | 0.024671  |
| N | -1.645244 | -0.274166 | -0.796665 |
| C | -1.702616 | 0.842323  | -1.736349 |
| C | -0.345251 | 0.802675  | -2.427814 |
| C | 3.752799  | -2.139220 | -0.114543 |
| C | -2.611857 | -0.231364 | 0.296376  |
| C | 0.103156  | -2.000355 | -0.699480 |

|    |           |           |           |
|----|-----------|-----------|-----------|
| N  | 4.830846  | -1.571587 | 0.441265  |
| C  | 6.206051  | -2.063937 | 0.238299  |
| C  | 6.943098  | -1.577871 | 1.490714  |
| C  | 6.247833  | -0.240617 | 1.802492  |
| C  | 4.773328  | -0.505476 | 1.456852  |
| C  | -4.051334 | -0.592447 | -0.084435 |
| C  | -4.293886 | -1.199407 | -1.260566 |
| C  | -5.610286 | -1.657603 | -1.825194 |
| Si | -5.395386 | -0.178028 | 1.207005  |
| C  | -6.635008 | 1.078535  | 0.513272  |
| C  | -4.584237 | 0.596513  | 2.738083  |
| C  | -6.291733 | -1.748651 | 1.779682  |
| H  | 4.073080  | 3.369307  | -0.632354 |
| H  | -0.666044 | 2.388502  | 0.679305  |
| H  | 0.492985  | 4.393353  | 1.548601  |
| H  | 2.827418  | 4.894628  | 0.906146  |
| H  | 1.546956  | -3.528513 | -0.825653 |
| H  | 2.113338  | -0.771780 | -2.475577 |
| H  | -0.081129 | -0.333894 | 0.652177  |
| H  | -1.856740 | 1.812242  | -1.230113 |
| H  | -2.523192 | 0.718967  | -2.450889 |
| H  | -0.083177 | 1.731613  | -2.938974 |
| H  | -0.310765 | -0.021256 | -3.147461 |
| H  | 3.972313  | -2.999336 | -0.745178 |
| H  | -2.604155 | 0.765306  | 0.777968  |
| H  | -2.270715 | -0.932814 | 1.069625  |
| H  | 3.777058  | 0.982699  | -2.053215 |
| H  | -0.691381 | -2.605905 | -1.124383 |
| H  | 6.205086  | -3.151258 | 0.121266  |
| H  | 6.634132  | -1.620224 | -0.670700 |
| H  | 6.792334  | -2.287233 | 2.312208  |
| H  | 8.018019  | -1.472918 | 1.322999  |
| H  | 6.371865  | 0.075854  | 2.841139  |
| H  | 6.647505  | 0.551626  | 1.159594  |
| H  | 4.203009  | -0.866533 | 2.323274  |
| H  | 4.264167  | 0.382943  | 1.069367  |
| H  | -3.437286 | -1.402789 | -1.906535 |
| H  | -6.465193 | -1.437845 | -1.181474 |
| H  | -5.795370 | -1.187336 | -2.800783 |
| H  | -5.595710 | -2.741485 | -2.005437 |
| H  | -7.372558 | 1.351358  | 1.278684  |
| H  | -6.123765 | 1.998067  | 0.203315  |
| H  | -7.183010 | 0.695410  | -0.354428 |
| H  | -5.351136 | 0.779541  | 3.501187  |
| H  | -3.828106 | -0.059926 | 3.185198  |
| H  | -4.105443 | 1.557859  | 2.518262  |
| H  | -6.822035 | -2.257361 | 0.967698  |
| H  | -5.581615 | -2.464447 | 2.211574  |
| H  | -7.027845 | -1.504088 | 2.555927  |
| H  | 2.218082  | -0.900721 | 0.690105  |

G(B3LYP/6-31G(d),CPCM/THF) = -1466.676032  
G(M06-2X/6-311+G(d,p),CPCM/THF) = -1466.442218

1 imaginary frequency

---

## TS\_13-12

|    |           |           |           |
|----|-----------|-----------|-----------|
| C  | -3.620108 | -2.955760 | -0.813703 |
| C  | -2.240550 | -2.862455 | -0.672919 |
| C  | -1.602909 | -2.468556 | 0.515886  |
| C  | -2.381740 | -2.164902 | 1.632259  |
| C  | -3.771779 | -2.264493 | 1.520177  |
| C  | -4.382361 | -2.645776 | 0.314377  |
| C  | -0.140251 | -2.412773 | 0.253675  |
| C  | -0.030551 | -2.970436 | -1.076945 |
| N  | -1.222456 | -3.148194 | -1.609806 |
| C  | 0.315602  | -0.647798 | -0.007509 |
| C  | -1.134423 | 0.717763  | -1.550169 |
| C  | -2.203631 | 1.098578  | -0.685595 |
| N  | 1.712022  | -0.785007 | 0.288358  |
| C  | 1.820380  | -1.547183 | 1.526273  |
| C  | 0.920177  | -2.780275 | 1.308930  |
| C  | -3.226118 | 1.890872  | -1.153631 |
| C  | 2.517046  | 0.445220  | 0.246746  |
| C  | -0.026757 | -0.042726 | -1.289515 |
| N  | -4.289282 | 2.330580  | -0.459689 |
| C  | -5.340900 | 3.189093  | -1.028524 |
| C  | -6.037242 | 3.758045  | 0.213438  |
| C  | -5.921124 | 2.610243  | 1.232299  |
| C  | -4.529829 | 2.018081  | 0.954918  |
| C  | 3.999652  | 0.234079  | -0.066648 |
| C  | 4.416198  | -0.945549 | -0.560954 |
| C  | 5.806655  | -1.354933 | -0.961896 |
| Si | 5.141836  | 1.737032  | 0.227467  |
| C  | 6.490155  | 1.331428  | 1.498839  |
| C  | 4.118770  | 3.181568  | 0.909526  |
| C  | 5.926460  | 2.310937  | -1.401411 |
| H  | -4.081893 | -3.258752 | -1.747674 |
| H  | -1.924951 | -1.866053 | 2.571133  |
| H  | -4.392891 | -2.046014 | 2.383597  |
| H  | -5.464400 | -2.710868 | 0.258835  |
| H  | -1.213563 | 1.094374  | -2.571374 |
| H  | 0.872763  | -3.139624 | -1.648130 |
| H  | -0.281612 | -0.254155 | 0.828213  |
| H  | 1.461794  | -0.959014 | 2.390346  |
| H  | 2.861373  | -1.817780 | 1.715250  |
| H  | 0.434079  | -3.092798 | 2.236515  |
| H  | 1.512364  | -3.627522 | 0.953557  |
| H  | -3.203070 | 2.220383  | -2.191342 |
| H  | 2.408183  | 0.988115  | 1.201269  |

|   |           |           |           |
|---|-----------|-----------|-----------|
| H | 2.077854  | 1.100525  | -0.514724 |
| H | -1.385981 | -3.447837 | -2.566058 |
| H | 0.664424  | -0.237069 | -2.106908 |
| H | -4.901837 | 3.958329  | -1.671174 |
| H | -6.036759 | 2.591970  | -1.634792 |
| H | -5.496948 | 4.641456  | 0.572325  |
| H | -7.071221 | 4.049799  | 0.011385  |
| H | -6.027248 | 2.942924  | 2.268130  |
| H | -6.693300 | 1.856709  | 1.040093  |
| H | -3.751929 | 2.483717  | 1.576391  |
| H | -4.487008 | 0.935443  | 1.122118  |
| H | 3.664055  | -1.724624 | -0.705095 |
| H | 6.553762  | -0.571589 | -0.815213 |
| H | 6.128822  | -2.237309 | -0.392060 |
| H | 5.830743  | -1.647977 | -2.020618 |
| H | 7.116627  | 2.214161  | 1.679253  |
| H | 6.047708  | 1.037604  | 2.458394  |
| H | 7.148095  | 0.518323  | 1.173459  |
| H | 4.761874  | 4.063840  | 1.018490  |
| H | 3.293990  | 3.458052  | 0.242071  |
| H | 3.693591  | 2.963383  | 1.896098  |
| H | 6.548063  | 1.538956  | -1.867586 |
| H | 5.155216  | 2.598276  | -2.126427 |
| H | 6.561024  | 3.189152  | -1.227393 |
| H | -2.214414 | 0.759638  | 0.345529  |

G(B3LYP/6-31G(d),CPCM/THF) = -1466.683541

G(M06-2X/6-311+G(d,p),CPCM/THF) = -1466.444374

1 imaginary frequency

---
